# Supplementary material for: Evidence for oxygen reduction reaction activity of a Ni(OH)2/graphene oxide catalyst
Source: Royal Society of Chemistry journal article supplement (doi:10.1039/c3ta13351f), 2013-01-01
Supplement: c3ta13351f.pdf [file c3ta13351f.pdf]

Cite this: DOI: 10.1039/c0xx00000x

www.rsc.org/xxxxxx

ARTICLE TYPE

## Supplementary Information

### Evidence for oxygen reduction reaction activity of a Ni(OH)<sub>2</sub>/graphene oxide catalyst

5 Elaheh Farjami,<sup>\*a</sup> Michael A. Rottmayer<sup>b</sup>, and L. Jay Deiner<sup>a</sup>

<sup>a</sup> Department of Chemistry, New York City College of Technology, City University of New York, 300 Jay Street, Brooklyn, NY USA. Fax: 01 718 260 5198; Tel: 01 718 260 5850; E-mail: efarjami@citytech.cuny.edu

<sup>b</sup> Air Force Research Laboratory, Wright Patterson Air Force Base, OH 45433, USA

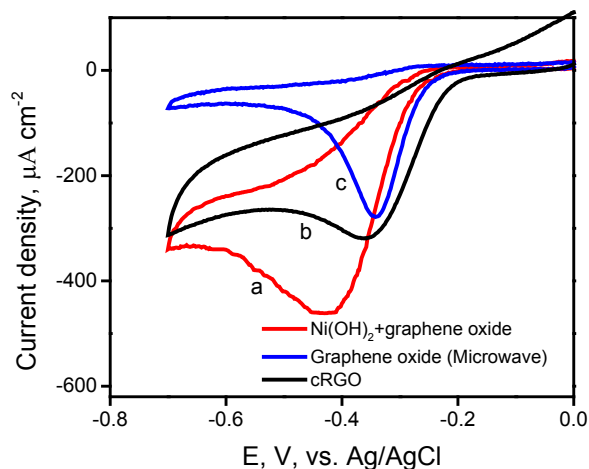

15 **Figure S1.** Cyclic voltammograms of (a) a physical mixture of Ni(OH)<sub>2</sub> particles with graphene oxide, (b) chemically reduced graphene oxide (cRGO), and (c) microwave treated graphene oxide on glassy carbon electrodes in O<sub>2</sub>-saturated 0.5 M NaOH (scan rate 100 mV s<sup>-1</sup>, scan direction from -0.1 V to -0.7 V vs. Ag/AgCl).

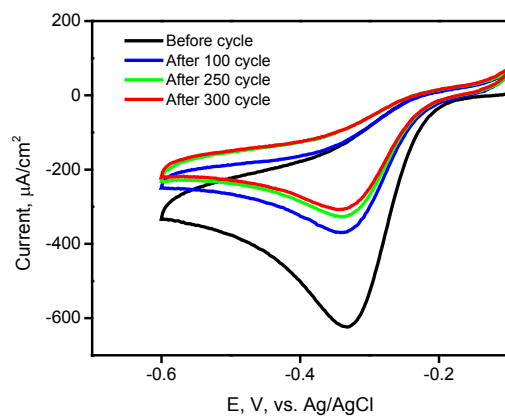

**Figure S2.** Sequential oxygen reduction cyclic voltammetry curves for the Ni(OH)<sub>2</sub>/graphene oxide hybrid catalyst in oxygen saturated 0.5M NaOH solution at potential scan rate of 50 mVs<sup>-1</sup>.

5

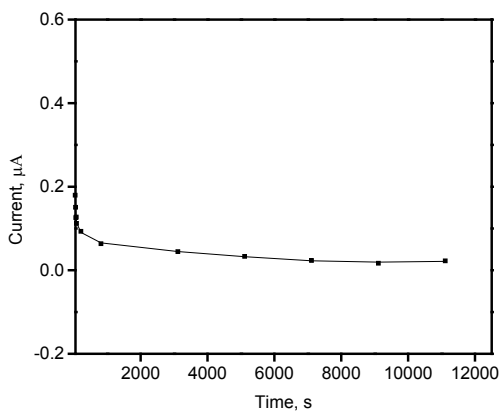

20
